# Supplementary material for: Transcriptome analysis of a spontaneous mutant in sweet orange [Citrus sinensis (L.) Osbeck] during fruit development
Source: PubMed Central journal article supplement — J Exp Bot. 2009 Mar;60(3):801–13. doi: 10.1093/jxb/ern329 (PMC2652045; doi:10.1093/jxb/ern329), 2009-03
Supplement: ern329_1.pdf [file ern329_1.pdf]

## Transcriptome analysis of a spontaneous mutant in sweet orange

(*Citrus sinensis* [L.] Osbeck) during fruit development

Qing Liu, Andan Zhu, Lijun Chai, Wenjing Zhou, Keqin Yu, Jian Ding, Juan Xu, Xiuxin Deng

**Table S3.** Primers used for amplifying candidate and control genes for real-time PCR.

| Gene Name | Forward Primer (5' 3')   | Reverse Primer (5' 3')   |
|-----------|--------------------------|--------------------------|
| ACT       | ATCTGCTGGAAGGTGCTGAG     | CCAAGCAGCATGAAGATCAA     |
| PEPCK     | CCTCATCCCAAGAATGTCATCC   | CTCCTTAATACCATCCTCTGTTCC |
| CP        | ATGCTGTCGTTGCTGTTGG      | CCCATCTCCATCTTAAAGTAGCC  |
| CPP       | GTCCACCACGGTCCTCTG       | TCCAAGCCTAAGAATTGAGAAGC  |
| gMDH      | GTGGCTTCTACGGTGACTG      | AACTGACTCCCTTCTGAATGC    |
| GLY       | TGAAGAGAAGTATGGTATGTGAAC | GAAGTGCGGACAATAGTAGAAG   |
| LTP       | AGACCAGGAAGCTCATGGAAA    | CTCTGCTGCCTCAGCTTGTT     |
| HB        | CCGGAGTATCATTGGGTGAA     | ACCCTGCTTCAGTTCAATCTTC   |
| ASR       | AGACCAGGAAGCTCATGGAAA    | ACCCATACACGCGAACACA      |
| Ac I      | TCTTGAGACTTCCATCCTTTCC   | GGCCGAGTTTGAGCTAGACA     |
| SuT       | AAAGTGCGGGACTATCATCG     | ACAGAGATGCAGAGCCTGGT     |
